# Supplementary material for: Epitope mapping of vaccine antigens Tc24 and TSA1 with antibodies from Trypanosoma cruzi infected patients
Source: Research Square preprint supplement (doi:10.21203/rs.3.rs-7216993/v1), 2025-08-07
Supplement: Supplementary file 1 [file a146228e8709197693b1fc12.docx]

**Supplementary Table 2. Patient epitope recognition profile and *T. cruzi* diagnostic.**

|  | Dominant epitope recognition profile (N=20) | Alternative epitope recognition profile (N=7) | Significance |
| --- | --- | --- | --- |
| Stat-Pak + | 14 (0.70) | 5 (0.71) |  |
| Stat-Pak - | 6 (0.30) | 2 (0.29) | C2=0.005; d.f.=1; P=0.94 |
| T-detect + | 11 (0.55) | 5 (0.71) |  |
| T-detect - | 9 (0.45) | 2 (0.29) | C2=0.59; d.f.=1; P=0.44 |
| ELISA + | 6 (0.30) | 3 (0.43) |  |
| ELISA - | 14 (0.70) | 4 (0.57) | C2=0.38; d.f.=1; P=0.54 |
| ELISA OD* | 0.723 ± 0.246 | 0.811 ± 0.417 | t=0.2, P=0.86 |
| Confirmed seropositive$ | 7 (0.35) | 3 (0.43) |  |
| Serodiscordant | 13 (0.65) | 4 (0.57) | C2=0.14; d.f.=1; P=0.71 |
| PCR + | 19 (0.95) | 6 (0.86) |  |
| PCR - | 1 (0.05) | 1 (0.14) | C2=0.58; d.f.=1; P=0.45 |
| Parasite burden# | 4.08 ± 0.72 | 2.54 ± 0.73 | t=1.5, P=0.24 |

*Optical density reading at 450 nm (mean ± SEM). $Confirmed seropositive was defined as with 2-3 reactive serological tests, serodiscordant as with 0-1 reactive serological test but *T. cruzi* PCR positive. #parasite burden in expressed as parasite equivalent/ml of blood (mean ± SEM).
